# Supplementary material for: Clayey–sand filter for the removal of pharmaceuticals from wastewater effluent: percolation experiments
Source: Royal Society of Chemistry journal article supplement (doi:10.1039/c6ew00034g), 2016-01-01
Supplement: c6ew00034g1.pdf [file c6ew00034g1.pdf]

## Clayey-sand filter for the pharmaceuticals removal from wastewater effluent: Percolation experiments

*Thomas Thiebault\*, Mohammed Boussafir, Régis Guégan, Claude le Milbeau and Lydie Le Forestier*

CNRS/ISTO, UMR 7327, 1A Rue de la Férollerie, 45071 Orléans, France  
Université d'Orléans/ISTO, UMR 7327, 1A Rue de la Férollerie, 45071 Orléans, France  
BRGM/ISTO, UMR 7327, 3 av. Claude Guillemin, 45060 Orléans, France

### Supplementary Information

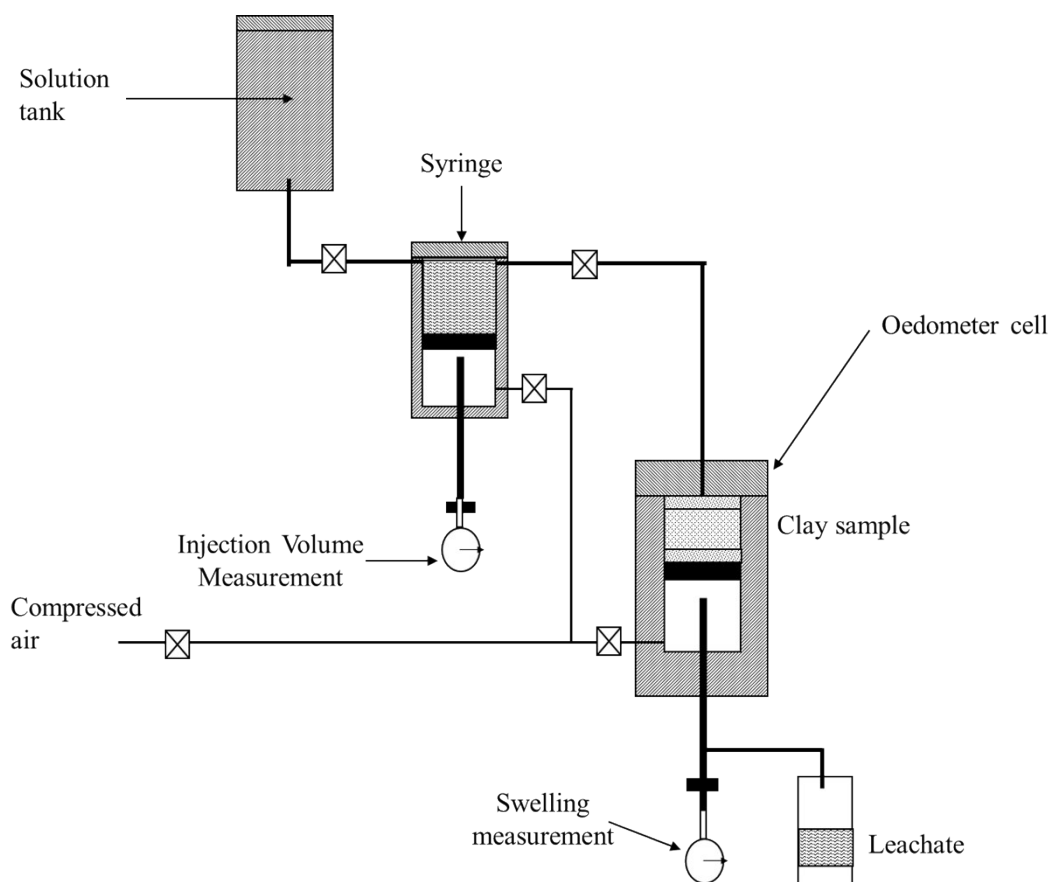

Figure S1 : Experimental equipment, adapted from *Jullien et al., 2002*

Table S1 : Concentration of the investigated pharmaceuticals in the used effluents (n=3) with the average effluent concentration in ng.L<sup>-1</sup> and RSD the Relative Standard Deviation and b.l.d. below detection limit

| Pharmaceutical | Average Effluent Concentration | Relative Standard Deviation |
|----------------|--------------------------------|-----------------------------|
| Ibuprofen      | 63,51                          | 1,22                        |
| Tramadol       | 39,71                          | 0,31                        |
| Gemfibrozil    | 33,80                          | 0,26                        |
| Doxepin        | 62,65                          | 0,08                        |
| Metoprolol     | b.l.d.                         |                             |
| Naproxen       | 57,43                          | 0,29                        |
| Ketoprofen     | 87,84                          | 0,21                        |
| Diazepam       | b.l.d.                         |                             |
| Fenofibrate    | b.l.d.                         |                             |
| Diclofenac     | 44,36                          | 0,34                        |
| Codeine        | 10,84                          | 0,16                        |
| Oxazepam       | 19,48                          | 0,43                        |
| Atenolol       | 52,90                          | 0,22                        |
| Progesterone   | b.l.d.                         |                             |
| Trimethoprim   | b.l.d.                         |                             |

Table S2: Basic physicochemical parameters of collected effluent

|                         |      |
|-------------------------|------|
| Parameters              |      |
| Conductivity (μS/cm)    | 950  |
| TOC (mg/L)              | 24.6 |
| Suspended Matter (mg/L) | 5    |
| P-PO4 (mg/L)            | 12.0 |
| N-NO2 (mg/L)            | 59,2 |

Table S3: Kinetic constants calculated with the first-order Lagergren equation based on the sorption kinetic values of each PhAC for each experiment, NL corresponds to non-linear fits

|    |                   | IBU   | TRA   | GEM   | DOX   | MET   | NAP   | KET   | DIA   | DCF   | COD   | OXA   | ATE   | PRO   | TRI   |
|----|-------------------|-------|-------|-------|-------|-------|-------|-------|-------|-------|-------|-------|-------|-------|-------|
| S1 | logk <sub>1</sub> | -1.74 | -1.71 | -1.75 | -1.73 | -1.72 | -1.85 | -1.70 | -1.70 | -1.81 | -1.73 | -1.71 | -1.72 | -1.73 | -1.74 |
|    | q <sub>m</sub>    | 0.99  | 1.41  | 1.18  | 1.16  | 1.33  | 0.94  | 1.29  | 1.02  | 0.88  | 1.13  | 1.06  | 1.33  | 1.08  | 1.12  |
|    | r <sup>2</sup>    | 0.94  | 0.95  | 0.95  | 0.96  | 0.95  | 0.92  | 0.94  | 0.94  | 0.90  | 0.95  | 0.94  | 0.95  | 0.96  | 0.95  |
| N1 | logk <sub>1</sub> | -1.72 | -1.78 | -1.77 | -1.74 | -1.74 | -1.73 | -1.76 | -1.76 | -1.70 | -1.76 | -1.72 | -1.73 | -1.73 | -1.73 |
|    | q <sub>m</sub>    | 1.20  | 1.23  | 1.17  | 1.14  | 1.27  | 1.20  | 1.28  | 1.03  | 0.90  | 1.08  | 1.07  | 1.27  | 1.07  | 1.12  |
|    | r <sup>2</sup>    | 0.96  | 0.97  | 0.97  | 0.96  | 0.95  | 0.97  | 0.95  | 0.95  | 0.96  | 0.95  | 0.94  | 0.95  | 0.95  | 0.95  |
| S2 | logk <sub>1</sub> |       | -1.44 | -1.05 | -1.43 | -1.43 |       | -1.20 | -1.35 | -1.41 | -1.41 |       | -1.45 | -1.43 | -1.43 |
|    | q <sub>m</sub>    | NL    | 1.30  | 0.83  | 1.25  | 1.35  | NL    | 1.10  | 0.79  | 0.65  | 1.02  | NL    | 0.91  | 1.07  | 1.13  |
|    | r <sup>2</sup>    |       | 0.93  | 0.78  | 0.96  | 0.93  |       | 0.91  | 0.92  | 0.94  | 0.92  |       | 0.96  | 0.96  | 0.96  |
| N2 | logk <sub>1</sub> | -1.21 | -1.43 | -1.41 | -1.43 | -1.42 | -1.39 | -1.43 | -1.45 | -1.57 | -1.40 | -1.40 | -1.40 | -1.43 | -1.43 |
|    | q <sub>m</sub>    | 0.72  | 1.14  | 1.11  | 1.21  | 1.33  | 0.95  | 1.37  | 1.06  | 1.54  | 1.11  | 0.75  | 0.82  | 1.07  | 1.12  |
|    | r <sup>2</sup>    | 0.94  | 0.96  | 0.95  | 0.96  | 0.96  | 0.97  | 0.96  | 0.96  | 0.97  | 0.95  | 0.96  | 0.98  | 0.96  | 0.95  |

With logk<sub>1</sub> the log of the first-order sorption rate constant, q<sub>1</sub> the modeling sorbed concentration at equilibrium in mg.g<sup>-1</sup>, r<sup>2</sup> the correlation coefficient and NL corresponds to Non-Linear fit

Table S4: Kinetic constants calculated with the pseudo second-order equation based on the sorption kinetic values of each PhAC for each experiment, NL corresponds to non-linear fits

|    |                   | IBU   | TRA   | GEM   | DOX    | MET   | NAP   | KET   | DIA   | DCF   | COD   | OXA   | ATE   | PRO   | TRI   |
|----|-------------------|-------|-------|-------|--------|-------|-------|-------|-------|-------|-------|-------|-------|-------|-------|
| S1 | logk <sub>2</sub> | -2.81 | -4.56 | -3.10 | -8.43  | -5.24 | -2.07 | -3.82 | -3.40 | -3.44 | -4.86 | -3.47 | -5.21 | -6.39 | -5.36 |
|    | q <sub>m</sub>    | 2.34  | 24.9  | 4.15  | 1666.7 | 50.0  | 1.15  | 9.84  | 4.76  | 4.07  | 26.74 | 5.05  | 48.3  | 144.9 | 46.95 |
|    | r <sup>2</sup>    | 0.96  | 1.00  | 0.99  | 1.00   | 1.00  | 0.95  | 0.99  | 0.99  | 0.99  | 1.00  | 0.99  | 1.00  | 1.00  | 0.99  |
|    | a                 | 118.5 | 58.1  | 72.58 | 97.44  | 69.3  | 87.74 | 67.77 | 111.7 | 166.3 | 101.1 | 114.9 | 68.9  | 115.6 | 103.8 |
| N1 | logk <sub>2</sub> | -7.47 | -3.11 | -3.08 | -4.75  | -3.65 | -4.08 | -3.57 | -3.18 | -4.11 | -3.38 | -4.83 | -3.88 | -4.21 | -4.57 |
|    | q <sub>m</sub>    | -555. | 4.60  | 4.00  | 23.75  | 7.95  | 12.55 | 7.38  | 3.71  | 9.31  | 4.87  | 23.75 | 10.3  | 11.89 | 19.05 |
|    | r <sup>2</sup>    | 0.99  | 0.99  | 0.99  | 1.00   | 0.99  | 0.99  | 0.99  | 0.99  | 0.99  | 0.99  | 0.99  | 0.99  | 0.99  | 1.00  |
|    | a                 | 96.45 | 60.6  | 74.85 | 98.95  | 70.5  | 76.41 | 68.50 | 110.6 | 148.1 | 100.1 | 119.4 | 71.3  | 113.8 | 101.8 |
| S2 | logk <sub>2</sub> |       | -3.30 | -1.32 | -5.40  | -3.02 |       | -2.51 | -1.91 | -2.61 | -2.38 |       | -2.24 | -6.85 | -4.41 |
|    | q <sub>m</sub>    | NL    | 7.50  | 0.45  | 76.92  | 6.00  | NL    | 2.84  | 1.03  | 1.76  | 2.20  | NL    | 1.58  | 344.8 | 22.73 |
|    | r <sup>2</sup>    |       | 0.99  | 0.96  | 1.00   | 0.99  |       | 0.99  | 0.97  | 0.99  | 0.99  |       | 0.98  | 1.00  | 0.99  |
|    | a                 |       | 35.8  | 100.2 | 42.02  | 29.3  |       | 40.41 | 75.34 | 133.4 | 49.21 | 182.7 | 69.9  | 59.60 | 49.96 |
| N2 | logk <sub>2</sub> | -2.71 | -3.80 | -3.55 | -4.48  | -3.45 | -3.88 | -4.24 | -4.41 | -2.04 | -3.42 | -2.68 | -2.99 | -6.22 | -3.43 |
|    | q <sub>m</sub>    | -1.59 | 12.2  | 8.47  | 26.46  | 9.65  | -10.1 | -22.3 | 20.83 | 0.94  | 7.23  | 2.10  | 3.76  | 166.7 | 7.23  |
|    | r <sup>2</sup>    | 0.90  | 0.99  | 0.99  | 0.99   | 0.99  | 0.99  | 0.99  | 0.99  | 0.99  | 0.99  | 0.99  | 0.99  | 1.00  | 0.99  |
|    | a                 | 202.9 | 42.5  | 49.4  | 43.1   | 30.3  | 74.4  | 35.01 | 58.6  | 123.5 | 50.3  | 109.5 | 68.9  | 59.2  | 51.3  |

With logk<sub>2</sub> the log of the second-order sorption rate constant, q<sub>2</sub> the modeling sorbed concentration at equilibrium in mg.g<sup>-1</sup>, a the slope of the linear fit and r<sup>2</sup> the correlation coefficient and NL corresponds to Non-Linear fit

Table S5: Kinetic constants calculated with the Bangham model based on the sorption kinetic values of each PhAC for each experiment, NL corresponds to non-linear fits

|    |                   | IBU   | TRA   | GEM   | DOX   | MET   | NAP   | KET   | DIA   | DCF   | COD   | OXA   | ATE   | PRO   | TRI   |
|----|-------------------|-------|-------|-------|-------|-------|-------|-------|-------|-------|-------|-------|-------|-------|-------|
| S1 | logk <sub>b</sub> | -2.10 | -1.74 | -1.79 | -1.99 | -1.83 | -1.83 | -1.78 | -1.99 | -2.19 | -2.00 | -2.08 | -1.83 | -2.06 | -2.01 |
|    | r <sup>2</sup>    | 0.97  | 0.99  | 0.99  | 1.00  | 1.00  | 0.97  | 0.99  | 0.99  | 0.99  | 0.99  | 0.99  | 0.99  | 1.00  | 0.99  |
|    | 1/n               | 0.98  | 0.97  | 0.92  | 1.00  | 0.99  | 0.83  | 0.95  | 0.94  | 0.96  | 0.99  | 0.99  | 0.99  | 1.00  | 0.99  |
| N1 | logk <sub>b</sub> | -2.03 | -1.67 | -1.81 | -1.98 | -1.81 | -1.83 | -1.80 | -2.00 | -2.08 | -1.96 | -2.08 | -1.81 | -2.05 | -1.99 |
|    | r <sup>2</sup>    | 0.99  | 0.99  | 0.99  | 1.00  | 0.99  | 0.99  | 0.99  | 0.99  | 0.99  | 0.99  | 0.99  | 0.99  | 0.99  | 0.99  |
|    | 1/n               | 1.03  | 0.89  | 0.92  | 0.99  | 0.96  | 0.95  | 0.95  | 0.94  | 0.94  | 0.95  | 1.00  | 0.95  | 0.99  | 0.98  |
| S2 | logk <sub>b</sub> |       | -1.53 | -1.95 | -1.62 | -1.44 |       | -1.48 | -1.78 | -1.99 | -1.63 |       | -1.69 | -1.77 | -1.68 |
|    | r <sup>2</sup>    | NL    | 0.99  | 0.97  | 1.00  | 0.99  | NL    | 0.99  | 0.99  | 0.98  | 0.99  | NL    | 0.96  | 1.00  | 0.99  |
|    | 1/n               |       | 0.96  | 0.82  | 1.00  | 0.93  |       | 0.84  | 0.84  | 0.86  | 0.89  |       | 0.89  | 1.00  | 0.98  |
| N2 | logk <sub>b</sub> | -2.38 | -1.56 | -1.66 | -1.63 | -1.43 | -1.83 | -1.54 | -1.76 | -1.98 | -1.68 | -1.98 | -1.66 | -1.77 | -1.73 |
|    | r <sup>2</sup>    | 0.95  | 0.99  | 0.99  | 0.99  | 0.99  | 0.99  | 0.99  | 0.99  | 0.99  | 0.99  | 0.99  | 0.98  | 1.00  | 0.99  |
|    | 1/n               | 1.09  | 0.93  | 0.96  | 0.99  | 0.94  | 0.97  | 1.01  | 0.99  | 0.85  | 0.96  | 0.92  | 0.93  | 1.00  | 0.99  |

*With logk<sub>b</sub> the log of the Bangham sorption rate constant, 1/n the slope of the fit, r<sup>2</sup> the correlation coefficient and NL corresponds to Non Linear fits*
